# Supplementary material for: Eco-geographic Study of Mahaleb (Prunus Mahaleb. L) in the Middle and Northern Parts of the Eastern Mediterranean
Source: Research Square preprint supplement (doi:10.21203/rs.3.rs-117177/v1), 2020-12-03
Supplement: Supplementary file 1 [file 975c2f0a849cee03cbf42fca.docx]

| Warm | +7ᴏC | < | m |  |  | no frost |
| --- | --- | --- | --- | --- | --- | --- |
| Temperate | +3ᴏC | ≤ | m | ≤ | +7ᴏC | occasionally frost |
| Cool | 0ᴏC | ≤ | m | ≤ | +3ᴏC | frost occurs normally |
| Cold | -3ᴏC | ≤ | m | ≤ | 0ᴏC | frost occurs for a long time |
| Very cold | m | ≤ | -3ᴏC |  |  | sometimes up to -10°C |
